1 Assessing the causal role of body mass index on cardiovascular health in young adults:

2 Mendelian randomization and recall-by-genotype analyses

3 Kaitlin H. Wade<sup>1,2</sup>, Scott T. Chiesa<sup>3</sup>, Alun D. Hughes<sup>4</sup>, Nish Chaturvedi<sup>4</sup>, Marietta

4 Charakida<sup>3</sup>, Alicja Rapala<sup>3</sup>, Vivek Muthurangu<sup>3</sup>, Tauseef Khan<sup>3</sup>, Nicholas Finer<sup>3</sup>, Naveed

5 Sattar<sup>5</sup>, Laura D. Howe<sup>1,2</sup>, Abigail Fraser<sup>1,2</sup>, Debbie A. Lawlor<sup>1,2</sup>, George Davey Smith<sup>1,2</sup>,

6 John E. Deanfield<sup>3</sup>, Nicholas J. Timpson<sup>1,2</sup>

7 <sup>1</sup>MRC Integrative Epidemiology Unit (IEU) at the University of Bristol, Bristol, UK

8 <sup>2</sup>School of Social and Community Medicine, Faculty of Health Sciences, University of

9 Bristol, Bristol, BS8 2BN

10 <sup>3</sup>Vascular Physiology Unit, Institute of Cardiovascular Science, University College

11 London, 1 St. Martin's Le Grand, London EC1A 4NP

12 <sup>4</sup>Cardiometabolic Phenotyping Group, Institute of Cardiovascular Science, University

13 College London, London, W1T 7HA

14 <sup>5</sup>Institute of Cardiovascular and Medical Sciences, BHF Glasgow Cardiovascular

15 Research Centre, University of Glasgow, Glasgow, G12 8TA

16

17 **Short title:** Causal role of body mass index and cardiovascular health

18 **Corresponding Author:**

19 Kaitlin H. Wade

20 Oakfield House

21 Oakfield Grove

22 Bristol

23 BS8 2BN

24 Email: [Kaitlin.Wade@bristol.ac.uk](mailto:Kaitlin.Wade@bristol.ac.uk)

25 Telephone: +44 (0)1173314092

26 **ABSTRACT**

27 **Background:** Mendelian randomization (MR) studies of body mass index (BMI) and  
28 cardiovascular health in mid-to-late life suggest causal relationships, but the nature of  
29 these has not been explored systematically at younger ages. Using complementary MR  
30 and recall-by-genotype (RbG) methodologies, our objective was to estimate the causal  
31 effect of BMI on detailed measures of cardiovascular health in a population of young  
32 healthy adults.

33 **Methods and Findings:** Data from the Avon Longitudinal Study of Parents and Children  
34 were used. For MR analyses, a genetic risk score (GRS) comprising 97 independent  
35 single nucleotide polymorphisms (SNPs) and constructed using external weighting was  
36 used as an instrument to test the causal effect of each unit increase in BMI ( $\text{kg}/\text{m}^2$ ) on  
37 selected cardiovascular phenotypes measured at age 17 (N=7909). An independent  
38 enriched sample from the same cohort participated in a RbG study at age 21, which  
39 enabled more detailed cardiovascular phenotyping (N=418; 191/227 from the  
40 lower/upper ~30% of a genome-wide GRS distribution predicting variation in BMI).  
41 The causal effect of BMI on the additional cardiovascular phenotypes was assessed by  
42 comparing the two recalled groups. Difference in mean BMI between RbG groups was  
43  $3.85\text{kg}/\text{m}^2$  (95% CI: 2.53, 4.63;  $P=6.09\times 10^{-11}$ ). In both MR and RbG analyses, results  
44 indicated that higher BMI causes higher blood pressure (BP) and left ventricular mass  
45 (indexed to height<sup>2.7</sup>, LVMI) in young adults (e.g. difference in LVMI per  $\text{kg}/\text{m}^2$  using  
46 MR:  $1.07\text{g}/\text{m}^{2.7}$ ; 95% CI: 0.62, 1.52;  $P=3.87\times 10^{-06}$  and per  $3.58\text{kg}/\text{m}^2$  using RbG:  
47  $1.65\text{g}/\text{m}^{2.7}$  95% CI: 0.83, 2.47;  $P=0.0001$ ). Additionally, RbG results indicated a causal  
48 role of higher BMI on higher stroke volume (SV; difference per  $3.58\text{kg}/\text{m}^2$ :  
49  $1.49\text{ml}/\text{m}^{2.04}$ ; 95% CI: 0.62, 2.35;  $P=0.001$ ) and cardiac output (CO; difference per

50 3.58kg/m<sup>2</sup>: 0.111/min/m<sup>1.83</sup>; 95% CI: 0.03, 0.19; P=0.01). Neither analysis supported a  
51 causal role of higher BMI on heart rate.

52 **Conclusions:** Complementary MR and RbG causal methodologies, together with a range  
53 of appropriate sensitivity analyses, showed that higher BMI is likely to cause worse  
54 cardiovascular health, specifically higher BP and LVMI, even in youth. These consistent  
55 results support efforts to prevent or reverse obesity in the young.

56 **Key words:** Body mass index, cardiovascular traits, ALSPAC, Mendelian randomization,  
57 recall-by-genotype, causality

58

## 59 **Introduction**

60 Higher body mass index (BMI) in adulthood is likely to be causally associated  
61 with numerous cardiovascular risk factors and disease outcomes[1-6]. Whilst chronic  
62 conditions may have origins early on, these relationships have been assessed  
63 predominantly from the 5<sup>th</sup> decade of life[7]. It is assumed that these relationships  
64 reflect long-term exposure to adiposity and other co-morbidities, which result in  
65 adverse structural and functional cardiovascular changes that are different from  
66 adaptations encountered earlier in the disease's evolution.

67 Numerous observational studies have reported associations between higher BMI  
68 and the presence of various subclinical markers of cardiovascular disease (CVD) even  
69 during young adulthood[8-11]. However, these observational study designs preclude a  
70 distinction between correlation and causation due to issues such as confounding or  
71 possible reverse causation (particularly in studies of older adults, whereby the  
72 'outcome' is responsible for the variation in the 'exposure'). Whilst recent results from  
73 patients who have had bariatric surgery provide supportive evidence for a causal role of  
74 greater adiposity on risk of major cardiovascular events[4, 5], no large studies have

75 assessed the causal impact between BMI and cardiovascular phenotypes in early life  
76 where risk emerges.

77 One method for establishing evidence for causal relationships between an  
78 exposure and outcome of interest is Mendelian Randomization (MR), a technique which  
79 uses genetic variations as instrumental variables (IVs) in observational epidemiological  
80 studies[12, 13]. Due to the technique's requirement for relatively large sample sizes to  
81 provide adequate statistical power, however, MR studies traditionally use either  
82 routinely collected clinical measures or data generated from high-throughput  
83 technologies. Detailed and precise subclinical measures of early structural and  
84 functional vascular adaptations are not commonly carried out in large population  
85 studies, as these are expensive, time-consuming and require highly skilled operators.  
86 This has limited their suitability for analyses using MR methodology.

87 Recall-by-genotype (RbG) studies are an innovative extension of MR designed to  
88 improve study efficiency through the creation of subgroups selected based on  
89 genotypes possessing known correlations with exposures of interest (e.g. BMI), rather  
90 than random sampling based on extremes of BMI itself. The added statistical power of  
91 this technique enables the efficient collection of extremely precise phenotypic data that  
92 may be otherwise impractical at the scale necessary for MR analyses[14, 15].

93 Using data from the Avon Longitudinal Study of Parents and Children (ALSPAC),  
94 we aimed to employ these two complementary analytical approaches (MR and RbG),  
95 alongside conventional multivariable regression analyses, to support the hypothesis  
96 that BMI causally influences variations in multiple clinically relevant measures of  
97 cardiovascular structure and function in adolescence and early adulthood, when risk  
98 emerges.

99

## 100 **METHODS**

### 101 ***Cohort description***

102           The Avon Longitudinal Study of Parents and Children (ALSPAC) is a prospective  
103 birth cohort study investigating factors that influence normal childhood development  
104 and growth. The cohort and study design have been described in detail previously[16,  
105 17] and are available at the ALSPAC website (<http://www.alspac.bris.ac.uk>). The study  
106 website contains details of all data that is available through a fully searchable data  
107 dictionary (<http://www.bris.ac.uk/alspac/researchers/data-access/data-dictionary>).  
108 Briefly, 14541 pregnant women resident in a defined area of the South West of England,  
109 with an expected delivery date of 1<sup>st</sup> of April 1991 - 31<sup>st</sup> of December 1992 were  
110 enrolled to the cohort. Of these, 13988 live-born children who were still alive 1 year  
111 later have been followed-up to date with regular questionnaires and clinical measures,  
112 providing behavioural, lifestyle and biological data. Ethical approval for the study was  
113 obtained from the ALSPAC Ethics and Law Committee and the Local Research Ethics  
114 Committee and written informed consent was obtained from both the parent/guardian  
115 and, after the age of 16, children provided written assent.

116

### 117 ***Study design***

118           The two complementary analytical approaches (MR and RbG) were used to  
119 support the hypothesis that BMI causally influences variations in multiple clinically  
120 relevant measures of cardiovascular structure and function in adolescence and early  
121 adulthood (Figure 1). Firstly, we used a genetic risk score (GRS) comprising 97 BMI-  
122 associated single nucleotide polymorphisms (SNPs) constructed using external  
123 weighting as an IV within an MR framework to investigate the causal effect of BMI on a  
124 range of vascular measures collected from 17-year-old participants[18].

125 Figure 1. Mendelian randomization (left) and recall-by-genotype (right) methodologies

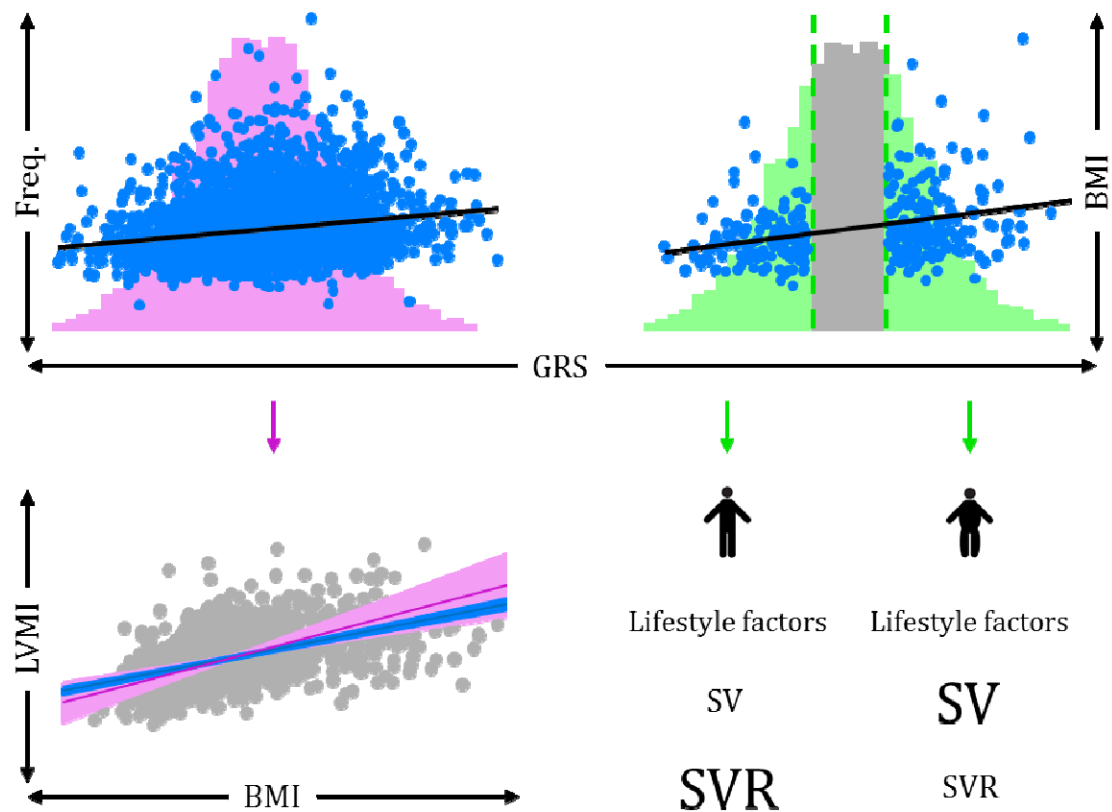

126  
127  
128  
129  
130  
131  
132  
133

*Top left:* The entire distribution of a genetic risk score (GRS, in pink) is used as an instrumental variable (IV) for body mass index (BMI) in a Mendelian randomization (MR) analysis to assess the causal nature of association between BMI and cardiovascular phenotypes (e.g. left ventricular mass index, LVMI).

*Bottom left:* Comparison of observational multivariable regression and MR-derived estimates using conventional MR methodology.

*Top right:* Instead of using the entire distribution of a GRS, the recall-by-genotype (RbG) method creates genetically recalled samples from the tails of a GRS distribution (green).

*Bottom right:* The RbG groups show a difference in mean BMI, however, there are no differences in confounding factors ("lifestyle factors"). The RbG method allows us to assess the change in detailed cardiovascular measures obtained through precise techniques, which would not otherwise be feasible in large enough studies needed for MR methodology (here, stroke volume [SV] and systemic vascular resistance [SVR]), between the recalled groups.

134 In parallel with this approach, we examined the ability of a highly-powered RbG  
135 design to reproduce these findings and explore their underlying mechanisms further  
136 through the extensive phenotyping of a smaller group of independent individuals,  
137 recalled specifically on a genome-wide GRS distribution[19].

138 Of those with full genetic data and consent (N=8,350), individuals were invited to  
139 the RbG study based on the lower and upper ~30% of a genome-wide GRS distribution,  
140 constructed from results from a genome-wide association study (GWAS) of BMI  
141 conducted by Speliotes *et al.*[19]. Individuals were recalled based on their appearance  
142 in the sampling groups, from the most extreme to the least to maximise power and  
143 difference in BMI. Of those invited (N=4602), 419 individuals were successfully recalled  
144 across the distribution of invited sampling groups (Supplementary Methods).

145 We excluded data of all females who were pregnant or individuals who had  
146 diabetes at both the 17-year clinic (N=7 pregnancies and 15 diabetics) and the 21-year  
147 recall (N=1 pregnancy and 0 diabetics). After exclusions, 7,909 individuals at age 17  
148 were included in MR-analyses, which used a GRS comprising 97 SNPs (constructed  
149 using external weighting) shown to be associated with BMI from a large-scale  
150 GWAS[18]. The independent sample of 418 individuals were used in the 21-year RbG  
151 analyses (Figure 2).

152

153 Figure 2. Flow of samples used for Mendelian randomization and recall-by-genotype  
154 studies

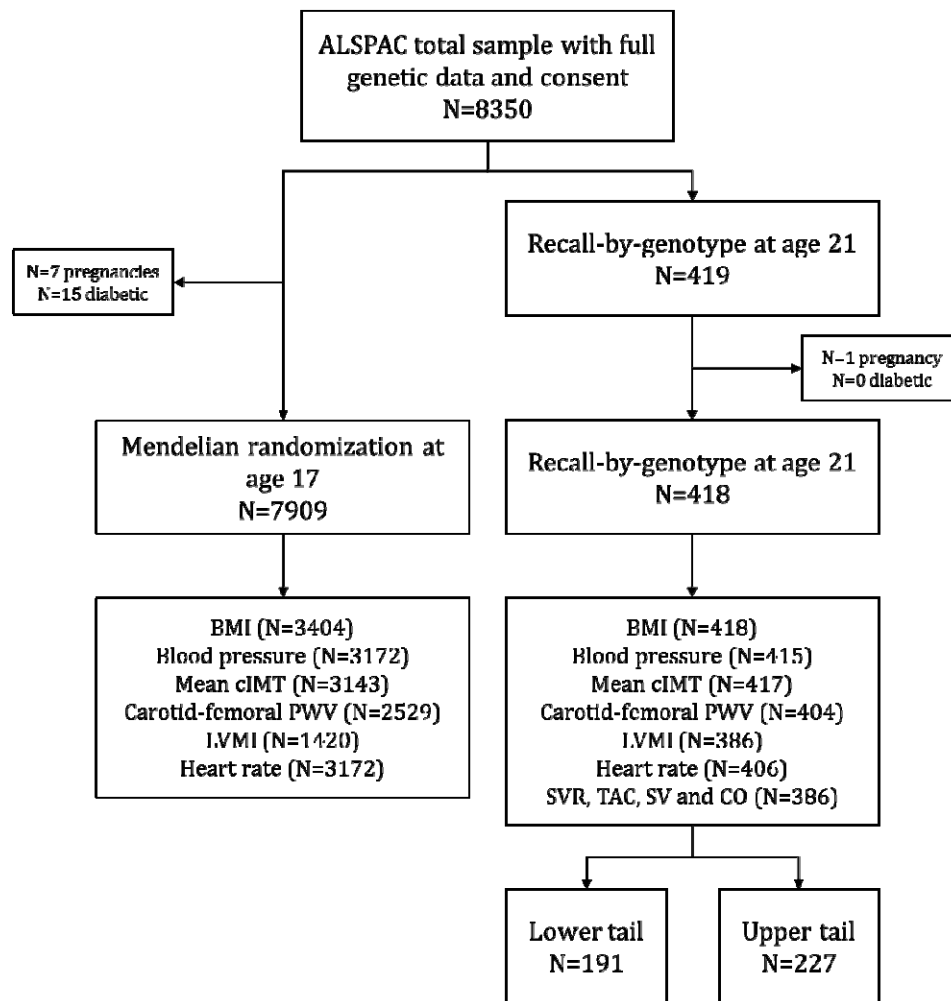

155

156 *The total number of individuals in ALSPAC with full genetic data and consent was 8,350. Of*  
157 *these, 7,909 individuals were used in MR analyses at age 17, which used a GRS comprising*  
158 *97 SNPs (and constructed using external weighting) shown to be associated with BMI from*  
159 *a large-scale GWAS[18]. The independent sample of 418 individuals was used in the RbG*  
160 *study, based on the lower and upper ~30% of a continuous genome-wide GRS distribution*  
161 *for BMI, constructed on the basis of results from a GWAS of BMI[19]. A total of 191 were*  
162 *within the lower tail and 227 were in the upper tail. The number of individuals with*  
163 *available data on the exposure (BMI) and cardiovascular outcomes are also presented.*



## 164 ***Genotyping***

165 Participants were genotyped using the Illumina HumanHap550 quad genome-  
166 wide SNP genotyping platform[20]. Participants were excluded due to having at least  
167 one of: incorrectly recorded sex, minimal or excessive heterozygosity, disproportionate  
168 levels of individual missingness, evidence of cryptic relatedness or non-European  
169 ancestry[20, 21]. SNPs with a minor allele frequency (MAF) of <1% and call rate of  
170 <95% were removed and only SNPs that passed an exact test of Hardy-Weinberg  
171 equilibrium ( $P < 5 \times 10^{-7}$ ) were included. Imputation of genotypes was conducted with  
172 MACH 1.0.16 Markov Chain Haplotyping software, using CEPH individuals from phase 2  
173 of the HapMap project as a reference (release #22).

174

## 175 ***Measures of adiposity at age 17 and 21***

176 At both ages, height was measured to the nearest centimetre using a stadiometer  
177 (SECA 213, Birmingham, UK) and weight to the nearest 0.1 kilogram, unshod and in  
178 light clothing, using electronic weighing scales (Marsden M-110, Rotherham, UK). BMI  
179 was calculated as weight (kg) divided by height-squared ( $m^2$ ).

180

## 181 ***Cardiovascular phenotypes at age 17***

182 The following cardiovascular phenotypes were used in MR analyses to assess the  
183 causal role of BMI on cardiovascular health at age 17.

184

## 185 ***Blood pressure and heart rate***

186 Sitting BP and heart rate were measured in both arms with an Omron 705 IT  
187 oscillometric BP monitor in accordance with European Society of Hypertension  
188 guidelines[22]. The average of the final two of three readings was used and the arm

189 with the greatest number of valid observations was used for analyses. From the systolic  
190 and diastolic BP readings (SBP and DBP, respectively), mean arterial pressure (MAP)  
191 was calculated ( $DBP + (SBP-DBP)/3$ ). Pulse pressure (PP) was calculated as the  
192 difference between SBP and DBP.

193

#### 194 Pulse-wave velocity (PWV)

195 Aortic stiffness (carotid-femoral PWV) was assessed using a Vicorder device  
196 (Skidmore Medical, UK). Participants rested supine on a couch with their head raised to  
197 30°. Real-time pulse-wave measures were recorded between proximal (right carotid)  
198 and distal (the upper right thigh) sensor cuffs and with the time delay between the two  
199 simultaneously measured cardiac cycles measured. Transit distance was measured from  
200 suprasternal notch directly to the top of the thigh cuff. Measurements were taken until  
201 pressure waveforms over the carotid and thigh area were of high quality and  
202 reproducible. Three carotid-femoral PWV measurements, within  $\leq 0.5$  m/s of each other,  
203 were averaged.

204

#### 205 Carotid intima-media thickness (cIMT)

206 Common carotid artery B-mode ultrasound images were acquired in the ear-to-  
207 ear plain with the head rotated to 45° from the midpoint using a Zonare Z.OneUltra  
208 system equipped with a L10-5 linear transducer (Zonare Medical Systems, CA, US).  
209 Images were recorded in Digital Imaging and Communications in Medicine (DICOM)  
210 format as 10 second cine-loop files for offline analysis using the Carotid Analyzer  
211 (Medical Imaging Applications, Coralville, IA). Left and right cIMT were taken to be the  
212 average of three end-diastolic measurements located on the far-wall of a single segment

213 of arterial wall 5–10 mm in length and 10 mm proximal to the bifurcation. The mean of  
214 left and right cIMT was calculated and used in analyses.

215

### 216 Left ventricular mass (LVM)

217 A sub-sample of study participants from the 17-year clinic underwent  
218 echocardiography using a HDI 5000 ultrasound machine (Phillips) and P4-2 Phased  
219 Array ultrasound transducer using a standard examination protocol. Left ventricular  
220 mass (LVM) was estimated according to American Society of Echocardiography (ASE)  
221 guidelines[23].

222

### 223 **Cardiovascular phenotypes at age 21**

224 The following detailed cardiovascular phenotypes were also measured in the two  
225 RbG groups at age 21.

226

### 227 Blood pressure and heart rate

228 BP and heart rate were measured in the right arm in the supine position using a  
229 digital automated sphygmomanometer (Omron M6, Omron Healthcare, Netherlands)  
230 and the mean of two values used for analyses. MAP and PP were calculated in the same  
231 way as at 17 years.

232

### 233 Pulse-wave velocity

234 Arterial stiffness was assessed using applanation tonometry (SphygmoCor Vx,  
235 AtCor Medical, NSW, Australia), with PWV estimated using ECG-gated pulse waves  
236 travelling between carotid-femoral sites. The patient was rested in a supine position  
237 and a handheld tonometer was placed over the left carotid artery in order to allow the

238 recording of 10-12 clear and reproducible pressure waveforms. The same tonometer  
239 was then used to measure a similar number of femoral arterial pulse waveforms in the  
240 inguinal crease at the top of the right leg. Transit distance was measured between the  
241 upper edge of the suprasternal notch and the femoral pulse measurement site via the  
242 umbilicus using a tape measure. The device software calculated the mean transit time  
243 (in milliseconds) from the recorded pulse waveforms and PWV was calculated as the  
244 transit distance/transit time.

245

#### 246 Carotid intima-media thickness

247       Ultrasound assessment of the thickness of intima media interface was measured  
248 using an identical protocol to that described for age 17.

249

#### 250 Cardiovascular Magnetic Resonance Imaging (MRI)

251       All measures were made using a 1.5T MR scanner (Avanto, Siemens Medical  
252 Solutions, Erlangen, Germany). Endocardial borders of the left ventricle (LV) were  
253 traced manually on short axis stacks at end-diastole and end-systole to evaluate end-  
254 diastolic volume (EDV) and end-systolic volume (ESV). Stroke volume (SV) was  
255 obtained by subtracting ESV from EDV. Epicardial borders were traced in end-diastole  
256 to calculate an epicardial volume. The EDV was subtracted from this volume, multiplied  
257 by assumed myocardial density to obtain LVM.

258       Flow quantification was performed through-plane in a cross-section of the  
259 ascending aorta as it passes the bifurcation of the pulmonary arteries using an ECG-  
260 gated spiral phase-contrast MR sequence, as described previously[24]. This technique  
261 allows images to be acquired within a short breath-hold (0.5 seconds) with a spatial  
262 resolution of 1.6 x 1.6 mm and a temporal resolution of 30 milliseconds. All images were

263 processed using in-house plug-ins for the Open source software OsiriX (OsiriX  
264 Foundation, Geneva, Switzerland). Flow images were manually segmented (using the  
265 modulus images) and SV (ml) was measured and cardiac output (CO, L/min) was  
266 calculated as SV x heart rate. At the time of flow imaging, BP was simultaneously  
267 measured using MRI-compatible oscillometric sphygmomanometer (Datex Ohmeda).  
268 Systemic vascular resistance (SVR; measured in  $\text{mmHg}\cdot\text{L}^{-1}\cdot\text{min}^{-1}$ ) was calculated by  
269 dividing the measured mean BP by CO. Total arterial compliance (TAC) was calculated  
270 by optimisation of the two-element Windkessel model, as previously described[25].  
271 Briefly, the flow curves and SVR were used as inputs to the model. PP was calculated for  
272 a series of modelled pressure curves generated using a range of TAC values from 0.1 to  
273  $5.0 \text{ mL}\cdot\text{mmHg}^{-1}$  in increments of 0.01. The compliance value that gave the smallest error  
274 between the modelled PP and the true PP was taken to be the true compliance.

275

## 276 ***Confounders***

277 Due to potentially confounding effects, the following variables were added as  
278 covariates in the multivariable regression analyses: maternal education and household  
279 occupation, plus current smoking status and the most recent records of physical activity  
280 and, where available, dietary intake.

281 At enrolment, mothers reported their educational attainment and both her and  
282 her partner's occupation. Highest household occupation was used to assign participants  
283 a household social class, using the 1991 British Office of Population Census Statistics  
284 classification[26]. Both maternal education and household social class were used as a  
285 general indication of socioeconomic position.

286 The most recent measurement of dietary intake of the participant was total  
287 energy intake at age 13, previously estimated from linear spline multi-level models of

288 the combination of food frequency questionnaires and diet diaries[27]. Additionally, the  
289 most recent record of physical activity was defined as the counts per minute (CPM) and  
290 minutes spent in moderate-to-vigorous activity (MVPA) obtained from a subsample of  
291 participants at the 15-year clinic by an MTI Actigraph AM7164 2.2 accelerometer worn  
292 for 7 days[28]. Smoking status was obtained by questionnaire and participants were  
293 coded as “ever” or “never” smokers.

294 For analyses using data from the 21-year RbG group, physical activity and  
295 smoking status were obtained via questionnaire at the time of cardiovascular  
296 phenotyping; however, information on recent dietary intake was not available.  
297 Participants at this age were similarly classed as “ever” or “never” smokers and weekly  
298 exercise was categorised as either “never/rarely/<2 times a week” or “≥2 times a  
299 week”.

300

## 301 ***STATISTICAL ANALYSES***

### 302 ***Pre-analysis transformations and adjustments***

303 As the distribution of residuals from the linear regression of BMI on carotid-  
304 femoral PWV was positively skewed, values of these variables were log transformed.  
305 LVM measured at each age was indexed to height to the power of 2.7 (LVMI)[23]. To  
306 assess the impact of adiposity on central vascular measures over and above that caused  
307 by stature[29], SVR and TAC were adjusted for height using  $SVR \times height^{1.83}$ ,  
308  $TAC/height^{1.83}$ [30], and both CO and SV measures were indexed to height by dividing CO  
309 by  $height^{1.83}$  and SV by  $height^{2.04}$ . The use of “positive” and “inverse” throughout the text  
310 refer to directional association rather than clinical implication. Stata 14 (Stata Corp,  
311 Texas) and R (<https://cran.r-project.org/>) were used for all analyses.

312

313

314 ***Multivariable regression***

315 Observational associations between BMI and each cardiovascular phenotype at  
316 age 17 were assessed using multivariable linear regression in three models: (i)  
317 unadjusted, (ii) adjusted for age, sex, smoking status and dietary intake of the  
318 participant, household social class and maternal education and (iii) additionally  
319 adjusted for physical activity (added as a separate model due to sample size).

320 Associations of the confounders with BMI, cardiovascular measures and weighted GRSs  
321 at each age were tested using linear regression.

322

323 ***Mendelian randomization***

324 The externally weighted GRS used as an instrument for BMI in MR analyses was  
325 generated from 97 independent SNPs shown to be reliably associated with BMI in the  
326 GWAS conducted by the Genetic Investigation of ANthropometric Traits (GIANT)  
327 consortium[18]. To generate the GRS, the dosage of each BMI-increasing allele at each  
328 locus in ALSPAC was weighted by the external effect size of the variant in the GWAS  
329 results[31, 32]. The doses were then added together and multiplied by the average  
330 external effect size of all the SNPs on BMI to reflect the number of average BMI-  
331 increasing alleles carried by each individual.

332 Two-stage least squares (2SLS) analysis was performed using the GRS as an  
333 instrument for BMI at age 17 (*ivreg2* command in Stata). *F*-statistics for the first-stage  
334 regression between the GRS and BMI were examined to check that the instruments  
335 were valid, satisfying the assumption that the instrument was sufficiently associated  
336 with the exposure[33]. The Durbin-Wu-Hausman (DWH) test for endogeneity was used

337 to compare multivariable regression and IV effect estimates (*ivendog* command in  
338 Stata)[34].

### 339 ***Recall-by-genotype***

340 Linear regression was used to assess the association of the genome-wide GRS  
341 group allocation (upper vs. lower ~30% of the genome-wide GRS distribution, as  
342 described above) with BMI and each of the cardiovascular phenotypes measured at age  
343 21. Each estimate therefore represents the mean difference in each variable with the  
344 corresponding mean difference in BMI between RbG groups.

345

### 346 ***Sensitivity analyses***

347 Both BP and heart rate are correlated with other cardiovascular measures,  
348 namely PWV, cIMT and LVMI[35-37]. To assess the causal association between BMI and  
349 these cardiovascular measures, independent of BP and heart rate, we took the residuals  
350 of the regression between each of these variables and both BP and heart rate and  
351 repeated MR and RbG main analyses using these residuals.

352 Additionally, evidence suggests that some of the cardiovascular phenotypes used  
353 in these analyses are not independent of height[23, 38, 39]. To account for this and the  
354 inconsistent residual correlation between BMI and height throughout the  
355 lifecourse[40], we assessed the association between the weighted GRS on height at age  
356 17 and explored the impact of adjustment for height and height-squared on the  
357 association between the weighted GRS and BMI. We also adjusted both multivariable  
358 regression and MR analyses for height and height-squared measured at the same time of  
359 the BMI exposure and cardiovascular phenotype and compared these to the main  
360 analyses.



361           The use of multiple alleles in MR analyses increases the potential for unbalanced  
362 pleiotropic effects due to aggregation of invalid genetic instruments having an effect in  
363 one particular direction[13, 32]. To investigate the validity of the weighted GRS as an IV,  
364 the MR-Egger[41] approach was used to detect and accommodate violations of the MR  
365 assumptions, where the intercept of the MR-Egger test can be interpreted as an estimate  
366 of the average pleiotropic effect across the genetic variants, with a non-zero intercept  
367 term indicating overall directional pleiotropy. MR-Egger estimates were compared to  
368 those obtained from the inverse-variance weighted (IVW)[41, 42] and weighted median  
369 methods[43], which provide estimates of the causal effect of BMI on cardiovascular  
370 phenotypes under varying assumptions of instrument validity. As in the main analyses,  
371 the estimates of the association between each SNP and BMI were obtained from an  
372 independent external source, as to not induce weak instrument bias in a two-sample MR  
373 setting[44, 45].

374           Consistent with previous studies[46], we performed a sensitivity analysis using a  
375 weighted GRS that was limited to the genetic variants that were associated with BMI in  
376 the analysis of all people of European descent and excluded those that only reached  
377 genome-wide significance in only one sex or stratum (n=77) in the GIANT  
378 consortium[18]. Additionally, a previous study in a large sample based in the UK[46]  
379 suggested exclusion of three variants owing to pleiotropy (rs11030104, rs13107325  
380 and rs3888190) and three SNPs that are not in Hardy-Weinberg equilibrium ( $P < 1 \times 10^{-6}$ ;  
381 rs17001654, rs2075650 and rs9925964). Therefore, as a sensitivity analysis, we  
382 excluded these additional SNPs, resulting in an instrument consisting of 71 independent  
383 SNPs.

384           Additionally, to assess the validity of the genome-wide GRS (derived from the  
385 results of the BMI GWAS conducted by Speliotes *et al.*[19] and used in main RbG

386 analyses), MR analyses were conducted using the same genome-wide GRS as an  
387 instrument for BMI, scaled to represent the same difference in mean BMI per unit  
388 increase in the genome-wide GRS compared to the Locke *et al.* score, comprising 97  
389 SNPs, used in main MR analyses.

390

### 391 ***In silico recall-by-genotype analyses***

392 To support the main RbG analyses at age 21 and the use of a genome-wide GRS,  
393 we conducted two *in silico* RbG analyses with available cardiovascular phenotypes at  
394 age 17. From the larger sample of individuals originally used in the MR analyses who  
395 had no missing data on BMI or cardiovascular outcomes at age 17 (N=1190), we  
396 randomly sampled 200 individuals from the lower and upper ~30% of the distribution  
397 of i) the Locke *et al.* GRS (N=97 SNPs, constructed using external weighting)[18] and ii)  
398 the genome-wide GRS from the Speliotes *et al.* GWAS used in main RbG analyses[19]. To  
399 do this, each of the scores was sorted by value and 400 individuals were kept from both  
400 the lower and upper ~30% of the distribution. Of those, 50% were randomly selected  
401 for analyses, leaving 200 at each of the lower and upper tails (comparable to the  
402 selection criteria for the main RbG study). This was also tested with an iterative random  
403 sampling approach (results not shown).

404

### 405 **RESULTS**

406 The MR cohort were 17.8 years old (SD = 0.4), consisted of 47.8% females and  
407 had an average BMI of 22.7kg/m<sup>2</sup> (SD = 4) (Table 1). In the RbG study, individuals were  
408 21.5 years old (SD = 0.9), had an average BMI of 24.5kg/m<sup>2</sup> (SD = 5.7) and 65.8% were  
409 females (Table 2).

410

411 Table 1. Descriptive statistics for ALSPAC 17-year clinic

| <b>Variable</b>                 | <b>N</b> | <b>Mean (SD) or percentage</b> |
|---------------------------------|----------|--------------------------------|
| <i>Participant's phenotypes</i> |          |                                |
| Age (years)                     | 3493     | 17.79 (0.42)                   |
| Sex (% female)                  | 7909     | 47.81                          |
| BMI (kg/m <sup>2</sup> )        | 3404     | 22.73 (3.99)                   |
| SBP (mmHg)                      | 3172     | 118.61 (10.95)                 |
| DBP (mmHg)                      | 3172     | 63.65 (6.56)                   |
| PP (mmHg)                       | 3172     | 54.96 (10.08)                  |
| MAP (mmHg)                      | 3172     | 81.97 (6.78)                   |
| Mean cIMT (mm)                  | 3143     | 0.48 (0.04)                    |
| Carotid-femoral PWV (m/s)       | 2529     | 5.75 (0.69)                    |
| LVMI (g/m <sup>2.7</sup> )      | 1420     | 28.93 (6.11)                   |
| Heart rate (bpm)                | 3172     | 64.45 (9.80)                   |
| Smoking status (% ever smoked)  | 2844     | 51.55                          |
| <i>Physical activity</i>        |          |                                |
| CPM (counts)                    | 1687     | 484.09 (180.99)                |
| MVPA (minutes)                  | 1687     | 23.73 (18.81)                  |
| Dietary intake (kcal)           | 7141     | 2260.24 (184.61)               |
| <i>Parental phenotypes</i>      |          |                                |
| Highest household social class  | 6598     |                                |
| I                               | 947      | 14.35                          |
| II                              | 2902     | 43.98                          |
| III (non-manual)                | 1651     | 25.02                          |
| III (manual)                    | 769      | 11.66                          |
| IV                              | 290      | 4.40                           |
| V                               | 39       | 0.59                           |
| Maternal education              | 6982     |                                |
| CSE                             | 1156     | 16.56                          |
| Vocational                      | 635      | 9.09                           |
| O-Level                         | 2453     | 35.13                          |
| A-Level                         | 1700     | 24.35                          |
| Degree                          | 1038     | 14.87                          |

412 ALSPAC = Avon Longitudinal Study of Parents and Children; BMI = body mass index; BP =  
413 blood pressure; cIMT = carotid intima-media thickness; CSE = certificate of secondary  
414 education; DBP = diastolic blood pressure; LVMI = left ventricular mass indexed to  
415 height<sup>2.7</sup>; MAP = mean arterial pressure; PWV = pulse wave velocity; SBP = systolic blood  
416 pressure; SD = standard deviation  
417

418 Table 2. Descriptive statistics for ALSPAC 21-year RbG group

| <b>Variable</b>                              | <b>N</b> | <b>Mean (SD) or percentage</b> |
|----------------------------------------------|----------|--------------------------------|
| <i>Participant's phenotype</i>               |          |                                |
| Age (years)                                  | 418      | 21.51 (0.94)                   |
| Sex (% female)                               | 418      | 65.79                          |
| BMI (kg/m <sup>2</sup> )                     | 418      | 24.52 (5.70)                   |
| SBP (mmHg)                                   | 415      | 116.97 (10.28)                 |
| DBP (mmHg)                                   | 415      | 67.23 (6.64)                   |
| PP (mmHg)                                    | 415      | 49.74 (9.57)                   |
| MAP (mmHg)                                   | 415      | 83.81 (6.65)                   |
| Mean cIMT (mm)                               | 417      | 0.46 (0.04)                    |
| Carotid-femoral PWV (m/s)                    | 404      | 5.58 (0.74)                    |
| SVR (mmHg/L/min)                             | 386      | 15.62 (3.02)                   |
| TAC (mL/mmHg)                                | 386      | 1.02 (0.23)                    |
| LVMI (g/m <sup>2.7</sup> )                   | 386      | 21.42 (4.15)                   |
| Heart rate (bpm)                             | 406      | 61.24 (9.43)                   |
| SV (ml)                                      | 386      | 89.69 (16.96)                  |
| CO (l/min)                                   | 386      | 5.70 (1.16)                    |
| Smoking status (% ever smoked)               | 417      | 17.27                          |
| Weekly exercise (% never/rarely/<2 per week) | 299      | 38.46                          |
| <i>Parental phenotypes</i>                   |          |                                |
| Highest household social class               | 370      |                                |
| I                                            | 91       | 24.59                          |
| II                                           | 169      | 45.68                          |
| III (non-manual)                             | 76       | 20.54                          |
| III (manual)                                 | 27       | 7.30                           |
| IV                                           | 7        | 1.89                           |
| Maternal education                           | 380      |                                |
| CSE                                          | 31       | 8.16                           |
| Vocational                                   | 28       | 7.37                           |
| O-Level                                      | 109      | 28.68                          |
| A-Level                                      | 120      | 31.58                          |
| Degree                                       | 92       | 24.21                          |

419 ALSPAC = Avon Longitudinal Study of Parents and Children; BMI = body mass index; BP =  
420 blood pressure; cIMT = carotid intima-media thickness; CO = cardiac output; CSE =  
421 certificate of secondary education; DBP = diastolic blood pressure; LVMI = left ventricular  
422 mass indexed to height<sup>2.7</sup>; MAP = mean arterial pressure; PP = pulse pressure; PWV = pulse  
423 wave velocity; SBP = systolic blood pressure; SD = standard deviation; SV = stroke volume;  
424 SVR = systemic vascular resistance; TAC = total arterial compliance  
425

426 ***Confounder analyses***

427 BMI and all of the cardiovascular phenotypes were associated with a majority of  
428 the confounding factors (Supplementary Tables S1 and S2, respectively).

429

430 ***Multivariable regression***

431 After adjusting for potential confounders, multivariable regression analyses  
432 provided evidence for positive associations of measured BMI with SBP, DBP, PP, MAP,  
433 LVMI and heart rate at age 17 (Table 3), as well as an inverse association with carotid-  
434 femoral PWV.

435

436 Table 3. Multivariable regression associations between BMI and cardiovascular phenotypes in ALSPAC 17-year clinic

| Outcome (units)                | N    | Difference in mean outcome per 1kg/m <sup>2</sup> higher BMI (95% CI) | P-value                 | N    | Difference in mean outcome per 1kg/m <sup>2</sup> higher BMI (95% CI) <sup>1</sup> | P-value                | N    | Difference in mean outcome per 1kg/m <sup>2</sup> higher BMI (95% CI) <sup>2</sup> | P-value                |
|--------------------------------|------|-----------------------------------------------------------------------|-------------------------|------|------------------------------------------------------------------------------------|------------------------|------|------------------------------------------------------------------------------------|------------------------|
| SBP (mmHg)                     | 3108 | 0.86 (0.76, 0.95)                                                     | 7.43x10 <sup>-74</sup>  | 2389 | 0.84 (0.74, 0.94)                                                                  | 6.31x10 <sup>-64</sup> | 1033 | 0.83 (0.68, 0.98)                                                                  | 1.00x10 <sup>-25</sup> |
| DBP (mmHg)                     | 3108 | 0.52 (0.47, 0.58)                                                     | 4.67x10 <sup>-77</sup>  | 2389 | 0.49 (0.42, 0.56)                                                                  | 2.73x10 <sup>-44</sup> | 1033 | 0.47 (0.36, 0.58)                                                                  | 1.44x10 <sup>-17</sup> |
| PP (mmHg)                      | 3108 | 0.33 (0.25, 0.42)                                                     | 1.98x10 <sup>-13</sup>  | 2389 | 0.35 (0.26, 0.44)                                                                  | 6.08x10 <sup>-15</sup> | 1033 | 0.36 (0.22, 0.49)                                                                  | 3.97x10 <sup>-07</sup> |
| MAP (mmHg)                     | 3108 | 0.63 (0.58, 0.69)                                                     | 1.13x10 <sup>-109</sup> | 2389 | 0.61 (0.54, 0.68)                                                                  | 2.89x10 <sup>-68</sup> | 1033 | 0.59 (0.48, 0.69)                                                                  | 5.64x10 <sup>-27</sup> |
| Mean cIMT (mm)                 | 3079 | 0.0001<br>(0.0003, 0.0005)                                            | 0.72                    | 2368 | -0.0001<br>(-0.001, 0.0004)                                                        | 0.65                   | 1028 | 0.0003<br>(-0.0005, 0.001)                                                         | 0.48                   |
| Carotid-femoral PWV (log(m/s)) | 2495 | -0.001<br>(-0.002, 0.0004)                                            | 0.20                    | 1957 | -0.001<br>(-0.002, 0.001)                                                          | 0.20                   | 867  | -0.003<br>(-0.005, -0.0004)                                                        | 0.02                   |
| LVMi (g/m <sup>2.7</sup> )     | 1420 | 0.79 (0.72, 0.86)                                                     | 7.66x10 <sup>-108</sup> | 1151 | 0.83 (0.75, 0.91)                                                                  | 2.02x10 <sup>-99</sup> | 569  | 0.95 (0.83, 1.07)                                                                  | 5.40x10 <sup>-57</sup> |
| Heart rate (bpm)               | 3108 | 0.21 (0.12, 0.29)                                                     | 3.50x10 <sup>-06</sup>  | 2389 | 0.20 (0.10, 0.31)                                                                  | 0.0001                 | 1033 | 0.24 (0.08, 0.39)                                                                  | 0.003                  |

437 *ALSPAC = Avon Longitudinal Study of Parents and Children; BMI = body mass index; BP = blood pressure; CI = confidence interval; cIMT =*  
 438 *carotid intima-media thickness; DBP = diastolic blood pressure; LVMi = left ventricular mass indexed to height<sup>2.7</sup>; MAP = mean arterial*  
 439 *pressure; PP = pulse pressure; PWV = pulse wave velocity; SBP = systolic blood pressure*

440 <sup>1</sup>*Adjusted for age, gender, smoking and dietary intake of the participant and maternal education and household social class*

441 <sup>2</sup>*Additionally adjusted for physical activity of the participant*

442 ***Mendelian randomization***

443 Each allele increase in the weighted GRS (comprising 97 SNPs) was associated  
444 with a 0.12kg/m<sup>2</sup> (95% CI: 0.10, 0.14;  $P=9.53 \times 10^{-28}$ ) higher BMI, explaining 3% of the  
445 variance (Figure 3). Unlike the direct measure of BMI and the cardiovascular  
446 phenotypes, the GRS was not associated with a majority of confounders (Supplementary  
447 Table S3). There was evidence for a positive effect of each kg/m<sup>2</sup> higher BMI on SBP  
448 (difference: 0.79mmHg; 95% CI: 0.30, 1.28;  $P=0.002$ ), DBP (difference: 0.29mmHg; 95%  
449 CI: 0.0002, 0.59;  $P=0.05$ ), PP (difference: 0.49mmHg; 95% CI: 0.03, 0.96;  $P=0.04$ ), MAP  
450 (difference: 0.46mmHg; 95% CI: 0.16, 0.75;  $P=0.002$ ) and LVMI (difference: 1.07g/m<sup>2.7</sup>;  
451 95% CI: 0.62, 1.52;  $P=3.87 \times 10^{-06}$ ) (Table 4). *F*-statistics for these analyses ranged from  
452 36 to 123. There was no strong evidence that the results from MR analyses were  
453 different to those from the multivariable regression analyses (all *P*-values for  
454 comparison > 0.12).

455

456 Figure 3. Association between weighted GRS (comprising 97 SNPs) and BMI in ALSPAC

457 17-year clinic

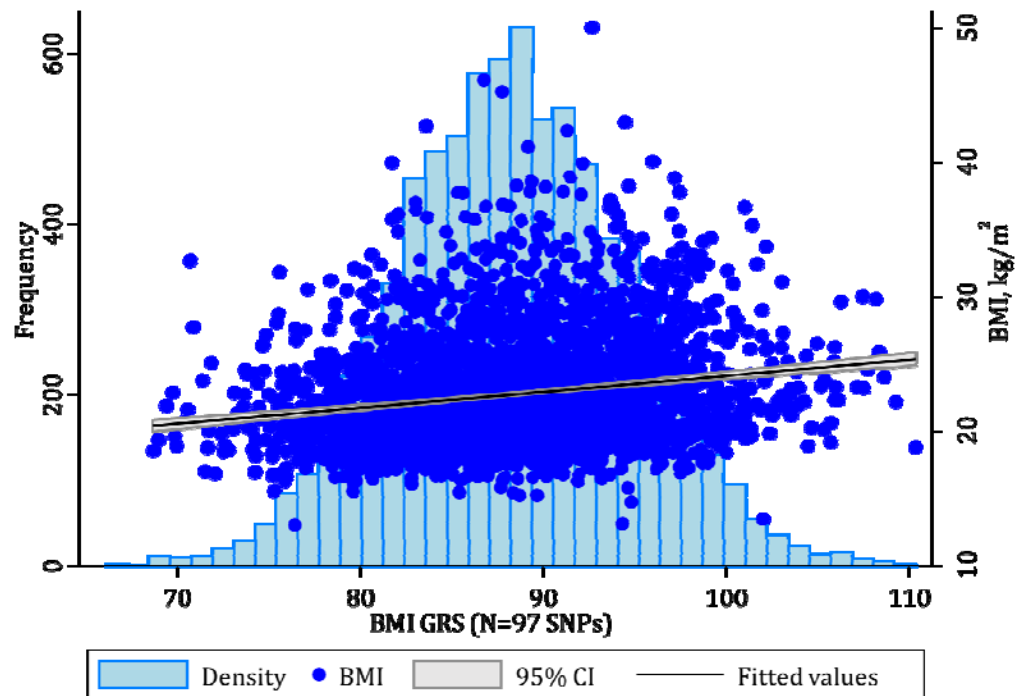

458

459 *The light blue histogram represents the weighted GRS (comprising 97 SNPs) distribution*

460 *(frequency, left-hand axis). The mid-blue scatter plot and linear trend with corresponding*

461 *95% confidence intervals represent the association between the same weighted GRS and*

462 *BMI (kg/m<sup>2</sup>, right-hand axis).*

463



464 Table 4. Mendelian randomization analyses of the association between BMI and cardiovascular phenotypes in ALSPAC 17-year clinic

| Outcome (units)                | N    | Difference in mean outcome per 1kg/m <sup>2</sup> higher BMI (95% CI) | P-value                | F-stat | P-value for difference in multivariable regression and MR analyses <sup>1</sup> |
|--------------------------------|------|-----------------------------------------------------------------------|------------------------|--------|---------------------------------------------------------------------------------|
| SBP (mmHg)                     | 3108 | 0.79 (0.30, 1.28)                                                     | 0.002                  | 115.76 | 0.78                                                                            |
| DBP (mmHg)                     | 3108 | 0.29 (0.0002, 0.59)                                                   | 0.05                   | 115.76 | 0.12                                                                            |
| PP (mmHg)                      | 3108 | 0.49 (0.03, 0.96)                                                     | 0.04                   | 115.76 | 0.49                                                                            |
| MAP (mmHg)                     | 3108 | 0.46 (0.16, 0.75)                                                     | 0.002                  | 115.76 | 0.24                                                                            |
| Mean cIMT (mm)                 | 3079 | 0.002 (-0.001, 0.004)                                                 | 0.14                   | 122.97 | 0.15                                                                            |
| Carotid-femoral PWV (log(m/s)) | 2495 | -0.001 (-0.01, 0.01)                                                  | 0.74                   | 86.30  | 0.92                                                                            |
| LVMI (g/m <sup>2.7</sup> )     | 1420 | 1.07 (0.62, 1.52)                                                     | 3.87x10 <sup>-06</sup> | 36.24  | 0.21                                                                            |
| Heart rate (bpm)               | 3108 | -0.05 (-0.51, 0.41)                                                   | 0.82                   | 115.76 | 0.26                                                                            |

465 *ALSPAC = Avon Longitudinal Study of Parents and Children; BMI = body mass index; BP = blood pressure; CI = confidence interval; cIMT =*  
 466 *carotid intima-media thickness; DBP = diastolic blood pressure; LVMI = left ventricular mass indexed to height<sup>2.7</sup>; MR = Mendelian*  
 467 *randomization; MAP = mean arterial pressure; PP = pulse pressure; PWV = pulse wave velocity; SBP = systolic blood pressure; SNP = single*  
 468 *nucleotide polymorphism*

469 <sup>1</sup>*P-value obtained from Durbin-Wu-Hausman test of heterogeneity*

470 **Recall-by-genotype**

471 Difference in mean BMI between RbG groups was 3.85kg/m<sup>2</sup> (95% CI: 2.53, 4.63;  
 472  $P=6.09 \times 10^{-11}$ ) (Table 5, Figure 4). Measures of both BMI and cardiovascular outcomes  
 473 were associated with a majority of confounders when assessed as a whole sample  
 474 (Supplementary Tables S4 and S5, respectively). There was no strong evidence that the  
 475 RbG group allocation was associated with confounders (Supplementary Table S6).

476

477 Table 5. Association between RbG groups and cardiovascular measures in ALSPAC 21-  
 478 year RbG group

| <b>Outcome (units)</b>              | <b>N</b> | <b>Difference in mean outcome per 3.58kg/m<sup>2</sup> higher BMI (95% CI)</b> | <b>P-value</b>         |
|-------------------------------------|----------|--------------------------------------------------------------------------------|------------------------|
| BMI (kg/m <sup>2</sup> )            | 418      | 3.58 (2.53, 4.63)                                                              | 6.09x10 <sup>-11</sup> |
| <i>Cardiovascular outcomes</i>      |          |                                                                                |                        |
| SBP (mmHg)                          | 415      | 3.70 (1.74, 5.66)                                                              | 0.0002                 |
| DBP (mmHg)                          | 415      | 2.25 (0.98, 3.52)                                                              | 0.001                  |
| PP (mmHg)                           | 415      | 1.45 (-0.40, 3.30)                                                             | 0.12                   |
| MAP (mmHg)                          | 415      | 2.73 (1.47, 3.99)                                                              | 0.00003                |
| Mean cIMT (mm)                      | 417      | 0.001 (-0.01, 0.01)                                                            | 0.82                   |
| Carotid-femoral PWV (log(m/s))      | 404      | 0.03 (0.01, 0.06)                                                              | 0.01                   |
| SVR (mmHg/L/min.m <sup>1.83</sup> ) | 386      | -1.03 (-2.49, 0.43)                                                            | 0.17                   |
| TAC (mL/mmHg/m <sup>1.83</sup> )    | 386      | 0.01 (-0.01, 0.02)                                                             | 0.37                   |
| LVMl (g/m <sup>2.7</sup> )          | 386      | 1.65 (0.83, 2.47)                                                              | 0.0001                 |
| Heart rate (bpm)                    | 406      | -0.08 (-1.93, 1.77)                                                            | 0.93                   |
| SV (ml/m <sup>2.04</sup> )          | 386      | 1.49 (0.62, 2.35)                                                              | 0.001                  |
| CO (l/min/m <sup>1.83</sup> )       | 386      | 0.11 (0.03, 0.19)                                                              | 0.01                   |

479 *ALSPAC = Avon Longitudinal Study of Parents and Children; BMI = body mass index; BP =*  
 480 *blood pressure; CI = confidence interval; cIMT = carotid intima-media thickness; CO =*  
 481 *cardiac output; DBP = diastolic blood pressure; LVMl = left ventricular mass indexed to*  
 482 *height<sup>2.7</sup>; MAP = mean arterial pressure; PP = pulse pressure; PWV = pulse wave velocity;*  
 483 *SBP = systolic blood pressure; SV = stroke volume; SVR = systemic vascular resistance; TAC*  
 484 *= total arterial compliance*  
 485

486 Figure 4. Association between RbG groups and BMI in ALSPAC 21-year RbG group

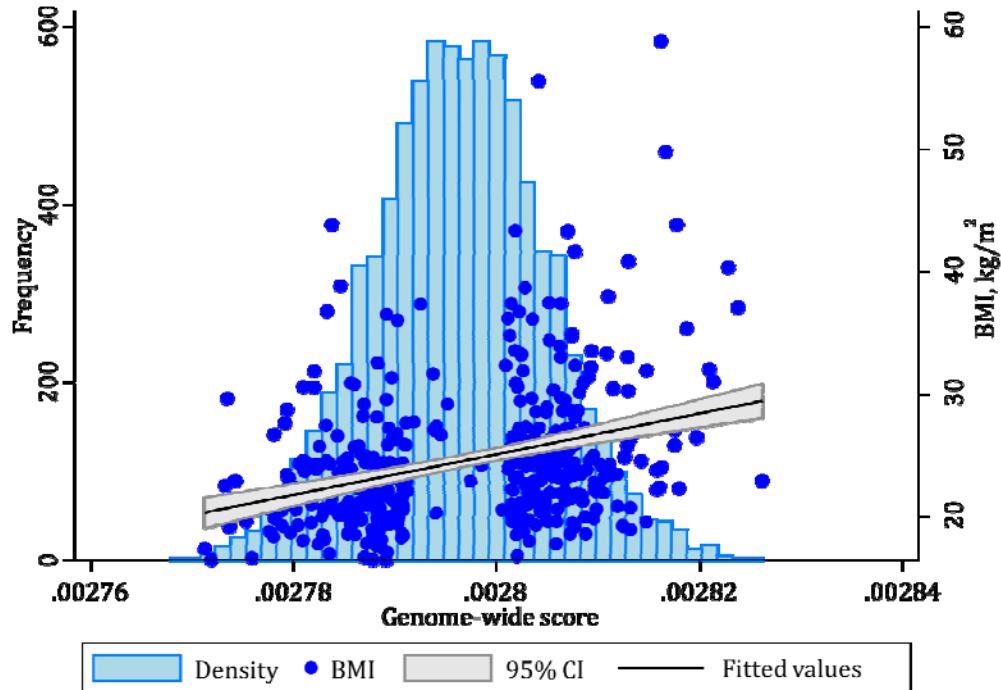

487

488 *The light blue histogram represents the genome-wide GRS distribution (frequency, left-*  
489 *hand axis). The mid-blue scatter plot and linear trend with corresponding 95% confidence*  
490 *intervals represent the association between the same genome-wide GRS and BMI (kg/m<sup>2</sup>,*  
491 *right-hand axis) included in the RbG groups.*

492

493           Of the cardiovascular measures that overlapped between the two methods (MR  
494 and RbG), the RbG groups were associated with higher SBP (difference in mean between  
495 higher vs. lower RbG groups: 3.70mmHg; 95% CI: 1.74, 5.66;  $P=0.0002$ ), DBP  
496 (difference: 2.25mmHg; 95% CI: 0.98, 3.52;  $P=0.001$ ), MAP (difference: 2.73mmHg; 95%  
497 CI: 1.47, 3.99;  $P=0.00003$ ) and carotid-femoral PWV (difference: 0.03log(m/s); 95% CI:  
498 0.01, 0.06;  $P=0.01$ ) (Table 5). Scaling the effect estimates to represent a kg/m<sup>2</sup> higher  
499 BMI, as in the MR analyses, these results are equivalent to a 1.03mmHg higher SBP, a  
500 0.63mmHg higher DBP, a 0.76mmHg higher MAP and a 0.01log(m/s) higher carotid-  
501 femoral PWV. There was therefore considerable consistency between effect estimates  
502 on the overlapping phenotypes at both ages, i.e. each kg/m<sup>2</sup> higher BMI had a causal  
503 effect of similar magnitude on SBP, DBP and MAP, whilst showing no association with  
504 heart rate or cIMT (Figure 5). However, there was evidence for a positive causal effect of  
505 BMI on carotid-femoral PWV in RbG analyses at age 21 that was not evident in MR  
506 analyses at 17 years.  
507

508 Figure 5. Comparison of estimates from multivariable regression, MR and RbG  
509 methodologies for the difference of all cardiovascular phenotypes available at both ages  
510 (graphs are separated by scale similarities) per 1 kg/m<sup>2</sup> higher BMI.

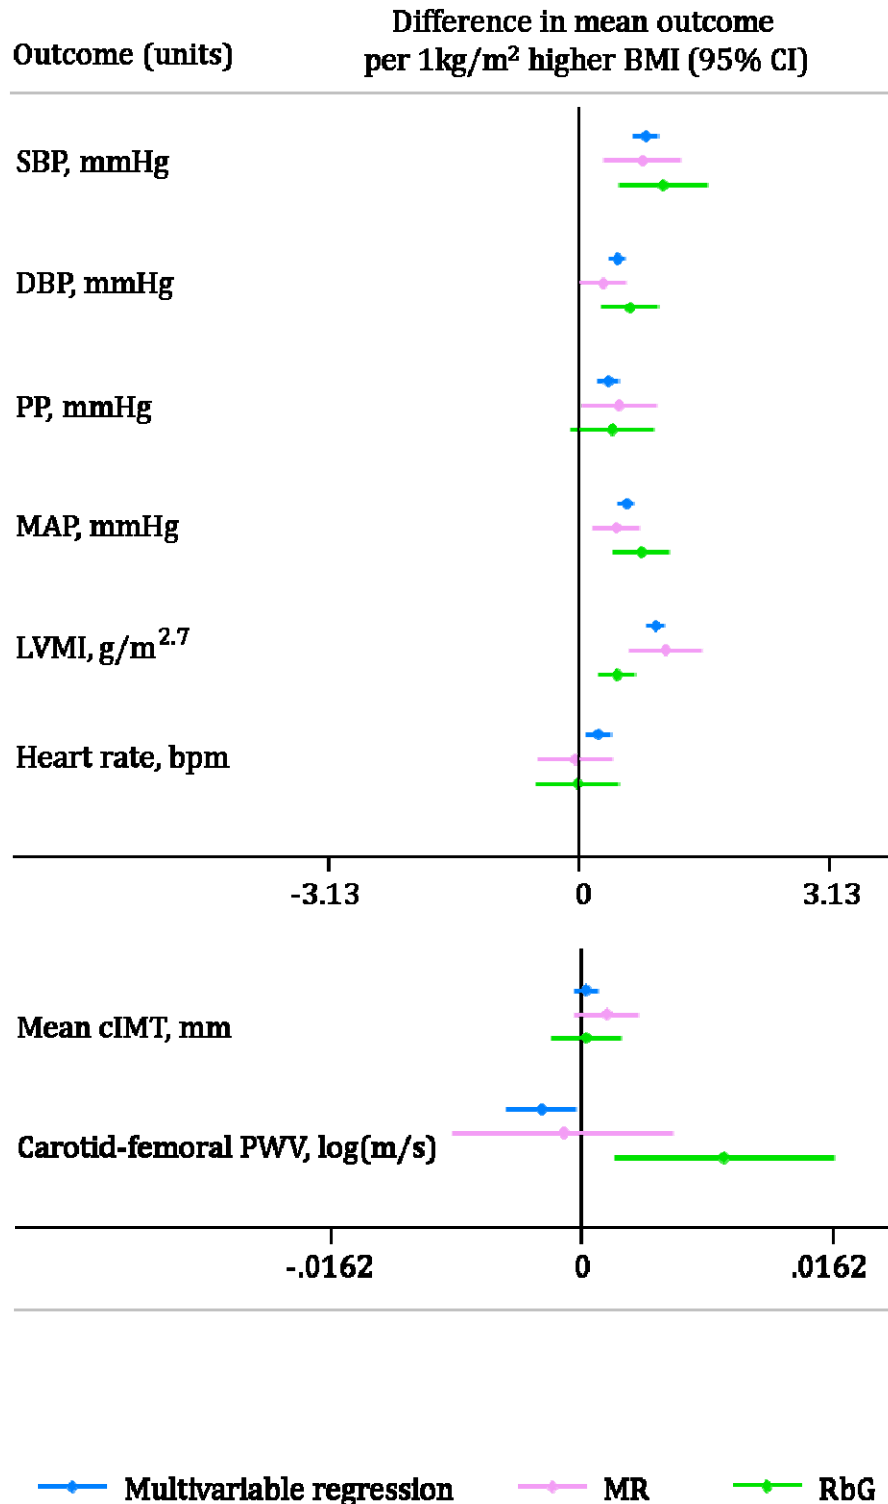

512 In addition to these cardiovascular measures, the RbG framework enabled the  
513 collection of more precise cardiovascular phenotypes and showed a positive causal role  
514 of higher BMI on MRI-derived LVMI (difference in mean between higher vs. lower RbG  
515 groups:  $1.65\text{g/m}^{2.7}$ ; 95% CI: 0.83, 2.47;  $P=0.0001$ ), SV (difference:  $1.49\text{ml/m}^{2.04}$ ; 95% CI:  
516 0.62, 2.35;  $P=0.001$ ) and CO (difference:  $0.11\text{l/min/m}^{1.83}$ ; 95% CI: 0.03, 0.20;  $P=0.01$ ),  
517 with no evidence of a difference in SVR or TAC.

518

### 519 ***Sensitivity analyses***

520 After adjusting for SBP and heart rate, both MR and RbG results for the effect of  
521 BMI on cIMT, carotid-femoral PWV and LVMI were mostly consistent with main analysis  
522 (Supplementary Table S7). The one exception was the positive effect of BMI on carotid-  
523 femoral PWV shown in RbG analysis, which attenuated to the null following adjustment  
524 for SBP and heart rate (estimate:  $0.02(\log(\text{m/s}))$ ; 95% CI: -0.01, 0.04;  $P=0.18$ ).

525 The weighted GRS (comprising 97 SNPs), used in MR analyses, was not  
526 associated with height or height-squared at age 17. Adjusting for both height and  
527 height-squared made no difference to the association between the GRS and BMI at age  
528 17 (Supplementary Table S8a), multivariable regression analyses (Supplementary Table  
529 S8b) or MR analysis (Supplementary Table S8c).

530 Where pleiotropy is perfectly balanced, an informative GRS is sufficient in an MR  
531 analysis, but this method is less able to cope with unbalanced pleiotropic effects (where  
532 invalid genetic instruments have an aggregate effect in one particular direction)[41].

533 The MR-Egger can go some way to accommodate violation of MR assumptions through  
534 pleiotropy, where the intercept term provides an estimate for unbalanced pleiotropy.

535 This test provided no evidence for unbalanced pleiotropic effects of the genetic variants  
536 included within the GRS on any cardiovascular outcome (all  $P$ -values for the intercept  $\geq$

537 0.24) (Supplementary Table S9). The MR effect estimates from IVW, MR-Egger and  
538 weighted median analyses for the causal effect of BMI on the cardiovascular phenotypes  
539 were largely consistent with the main analyses, though the effect estimate of BMI on  
540 SBP did not agree for the weighted median analyses compared to the main MR, IVW and  
541 MR-Egger estimates, albeit with very wide confidence intervals (Supplementary Table  
542 S9 and Supplementary Figures S1a-S1e).

543 Both the instrument containing 77 SNPs (found in Europeans and analyses of  
544 both sexes only in the GIANT GWAS, Supplementary Figure S2) and 71 SNPs (found in  
545 Europeans only and removing potentially pleiotropic SNPs and those that were not in  
546 HWE in a large sample based in the UK, Supplementary Figure S3) were associated with  
547 BMI to a comparable extent as the GRS comprising the full set of 97 SNPs  
548 (Supplementary Table S10) and produced similar results to the main analyses  
549 (Supplementary Tables S11a and S11b, respectively). Similarly, when the genome-wide  
550 GRS initially used to recall individuals to the RbG study was implemented in MR  
551 analyses, the GRS was associated with a comparable change in BMI (Supplementary  
552 Table S10, Supplementary Figure S4) and produced similar results to main MR analyses  
553 (Supplementary Table S12).

554

### 555 ***In silico recall-by-genotype analyses***

556 In both *in silico* RbG analyses, the difference in mean BMI between the two RbG  
557 groups was similar (1.63kg/m<sup>2</sup>; 95% CI: 0.93, 2.32;  $P=5.89 \times 10^{-06}$  and 1.65kg/m<sup>2</sup>; 95%  
558 CI: 0.91, 2.38;  $P=1.43 \times 10^{-05}$  between RbG groups sampled from lower and upper ~30%  
559 of the tails of the Locke *et al.* GRS and the Speliotes *et al.* genome-wide GRS  
560 distributions, respectively), each explaining 5% of the variance in BMI (Supplementary  
561 Table S13 and Supplementary Figures S5 and S6, respectively). Most results from both

562 *in silico* RbG analyses were in the same direction of effect and also in the same direction  
563 as results from the main RbG analyses (Supplementary Table S14a and S14b,  
564 respectively). For example, scaling the effect estimates to represent a kg/m<sup>2</sup> higher BMI,  
565 as in the main analyses, the equivalent effect estimates using the weighted GRS  
566 (comprising 97 SNPs) and the genome-wide GRS, respectively, were 0.87mmHg (95%  
567 CI: -1.23, 2.97; *P*=0.42) and 0.67mmHg (95% CI: -1.46, 2.79; *P*=0.54) for SBP, 1.45g/m<sup>2.7</sup>  
568 (95% CI: 0.27, 2.63; *P*=0.02) and 1.83g/m<sup>2.7</sup> (95% CI: 0.68, 2.98; *P*=0.002) for LVMI and  
569 -0.01log(m/s) (95% CI: -0.03, 0.02; *P*=0.59) and -0.01log(m/s) (95% CI: -0.03, 0.01;  
570 *P*=0.22) for carotid-femoral PWV. However, the direction of effect for DBP, MAP and  
571 heart rate differed between the two *in silico* sensitivity analyses (with one always being  
572 consistent with the main analyses), but these *in silico* analyses had wide confidence  
573 intervals. The iterative random sampling produced the same results (not shown).

574

## 575 **Discussion**

### 576 *Summary and comparison of findings*

577 In a large cohort of young adults, we employed two complementary analyses  
578 (MR and RbG) to investigate the causal effect of higher BMI on measures of  
579 cardiovascular structure and function and compared these to adjusted multivariable  
580 regression results. Alongside multivariable regression and MR analyses, the RbG  
581 method predominantly allowed the collection of extremely precise cardiovascular  
582 phenotypes that would otherwise be impractical at scale.

583 Regarding the cardiovascular phenotypes that were used across MR, RbG and  
584 multivariable regression analyses in the current study, our results are consistent with  
585 previous observational studies in children and adults[47-49] and across all three  
586 methodologies used. Results suggest that higher BMI causes higher BP (SBP, DBP, PP



587 and MAP) and higher LVMI, the latter suggesting adverse cardiac structure, even in  
588 young adults. Furthermore, the similarity of findings across these methods, given  
589 different sources of bias between the MR and RbG on the one hand[41, 50] and  
590 multivariable regression on the other[13], strongly support causality in this instance. If  
591 further sustained through adulthood, these cardiovascular effects of higher BMI are  
592 likely to increase CVD risk and CVD-specific mortality in later life[51-55].

593         Previous multivariable regression results from smaller observational studies in  
594 children and adolescents have found higher BMI to be associated with faster PWV and  
595 thicker cIMT[56-59]. In contrast to this, our three methods gave results that did not  
596 support a causal effect for cIMT. This suggests that previous studies may have been  
597 influenced by residual confounding or bias, for which we have been better able to  
598 control here. This conclusion is also supported to some extent by analysis of the same  
599 variables at a lower age in an observational context[47]. With less consistent results  
600 across our analysis approaches, higher BMI was associated with slower PWV at age 17  
601 years (i.e. healthier PWV) in multivariable regression analysis and a faster PWV (i.e.  
602 worse PWV) in RbG analysis, with MR analysis showing a null association (Figure 5).  
603 Indeed, another previous study suggests that the relationship between BMI and PWV  
604 may be inverse in youth and becomes positive at older ages[60].

605         As might be expected, higher BMI resulted in increased CO in our RbG study and,  
606 although contrary to other observational studies at this age[61, 62], this appeared to be  
607 solely driven by SV, as neither our MR or RbG analyses suggested a causal effect of BMI  
608 on heart rate. It is possible that previously reported associations between BMI and  
609 heart rate may be a result of unmeasured confounding. The BMI-mediated change in SV  
610 (and consequently CO) seen at age 21 is therefore likely to at least partially account for

611 the cardiac hypertrophy and higher BP that we see in multivariable regression, MR and  
612 RbG both ages in the data analysed here.

613

#### 614 *Strengths and limitations*

615 A key strength is the comparison of results from confounder-adjusted  
616 multivariable regression, MR and RbG, along with a range of appropriate sensitivity  
617 analyses, which together provide strong evidence for a causal effect of higher BMI on BP  
618 and cardiac structure (LVMI) in young adulthood. This is one of the first uses of RbG for  
619 BP and cardiac structure, where we could compare results directly to multivariable  
620 regression and MR within the same general population. The consistency between  
621 results found from RbG with 418 participants to those from MR with 7,909 participants  
622 suggests this approach is valid and statistically efficient. Furthermore, the RbG method  
623 allowed the collection of precise cardiovascular phenotypes that would otherwise not  
624 have been possible in sample sizes required for MR. For example, we could explore the  
625 impact of BMI on SV and CO, measures that are prohibitively expensive to undertake in  
626 several thousands of participants.

627 In contrast to these strengths, it is of course the case that both the MR and RbG  
628 analyses may be biased if the IV analyses assumptions are violated[13]. These require,  
629 firstly, that the genetic instruments need to be robustly related to the exposure (here  
630 BMI). We used variants in both MR and RbG that have been shown to be genome-wide  
631 significant and replicated; the first-stage F-statistics, a measure of instrument strength,  
632 were high for all the MR analyses. Secondly, it is assumed that confounders of the  
633 observational BMI-cardiovascular outcome association are not related to the genetic  
634 instrument. There is empirical evidence that this is unlikely to be the case[63] and for  
635 observed confounders we demonstrate it in our analyses here. Thirdly, it is assumed

636 that there is no path from the genetic instrument to the outcomes other than through  
637 BMI, which may result from horizontal pleiotropy. Using an aggregate allelic score  
638 increases the possibility of horizontal pleiotropy and we therefore undertook sensitivity  
639 analyses to explore this[41]. Across a range of sensitivity analysis (including the MR-  
640 Egger and weighted median approaches in the MR analyses, limiting the GRS to different  
641 subsets of genetic instruments and performing *in silico* RbG analyses using different  
642 genetic proxies), provided broadly similar results to main analyses, lending more  
643 confidence to the causal estimates and direction of effect with higher BMI and  
644 suggesting that these were not largely driven by horizontal pleiotropy.

645 Although the RbG approach enabled sampling from lower and upper ~30% of a  
646 genome-wide GRS, which produced a difference of ~3.5kg/m<sup>2</sup> in BMI, the genome-wide  
647 nature of the score could be considered less refined than the GRS used in MR analyses,  
648 comprising 97 SNPs shown to be robustly associated with BMI in a large meta-analyses  
649 of GWASs[18]. Despite this, sensitivity analyses performed showed that the genome-  
650 wide GRS provided comparable results to MR-analyses and *in silico* RbG analyses.

651 One complication in some of the sensitivity analyses performed (specifically,  
652 adjusting for variables including BP, heart rate and height in multivariable and MR  
653 analyses) is the potential for inducing collider bias[64, 65]. However, due to the overall  
654 consistency in effect estimates generated from the various sensitivity analyses, this is  
655 unlikely to be the case in this study. More generally, it is possible that some of the  
656 differences in effect size of BMI on cardiovascular outcomes (for example, carotid-  
657 femoral PWV) between methodologies may relate to the difference in age at which the  
658 methods were applied. In addition, given the small range of some of the cardiovascular  
659 outcomes (for example, cIMT) in these young individuals and the potentially small effect  
660 size of BMI, power to detect such small effect sizes in this context may be limited.

661 Further, we adjusted for a range of potentially confounding factors in multivariable  
662 regression analyses but even in such a comprehensive longitudinal cohort, it can be  
663 difficult to accurately measure (and therefore appropriately account for) all  
664 confounders. Indeed, this illustrates the need for better methods (such as MR and RbG  
665 employed here) to assess the causal nature of the association between BMI and  
666 cardiovascular health.

667

### 668 *Conclusion*

669 With this innovative study design, using complementary multivariable  
670 regression, MR and RbG analyses, together with a range of appropriate sensitivity  
671 analyses, we found results that strongly suggest a causal role of higher BMI resulting in  
672 adverse levels of BP and LVMI. These findings support efforts to reduce BMI and  
673 prevent the obesity burden from a young age, with the aim of attenuating the  
674 development of vascular and cardiac changes, known to be the precursors of long-term  
675 adverse cardiovascular outcomes, and preventing the development of additional  
676 peripheral vascular damage not yet evident at this early stage of life.

677

### 678 *Acknowledgements*

679 We are extremely grateful to all the families who took part in this study, the  
680 midwives for their help in recruiting them, and the whole ALSPAC team, which includes  
681 interviewers, computer and laboratory technicians, clerical workers, research scientists,  
682 volunteers, managers, receptionists and nurses. We'd also like to thank Frank  
683 Dudbridge for ongoing conversations regarding genetic risk scores used in Mendelian  
684 randomization methodologies. The UK Medical Research Council (MRC) and the  
685 Wellcome Trust (Grant ref: 102215/2/13/2) and the University of Bristol provide core

686 support for ALSPAC. This publication is the work of the authors and KHW and NJT serve  
687 as guarantors for the contents of this paper. This research was specifically funded  
688 through grants from the British Heart Foundation (grant numbers: RG/10/004/28240,  
689 PG/06/145 and CS/15/6/31468) and the UK MRC, University of Bristol and Wellcome  
690 Trust (grant numbers: MC\_UU\_12013/1-9, 096989/Z11/Z, 086676/7/08/Z, MR-  
691 M009351/1, MR/M020894/1 and 202802/Z/16/Z). GWAS data was generated by  
692 Sample Logistics and Genotyping facilities at Wellcome Sanger Institute and LabCorp  
693 (Laboratory Corporation of America) using support from 23andMe.

#### 694 References

- 695 1. Calle EE, Thun MJ, Petrelli JM, Rodriguez C, Heath CWJ. Body-Mass Index and  
696 Mortality in a Prospective Cohort of U.S. Adults. *New England Journal of Medicine*.  
697 1999;341(15):1097-105.
- 698 2. Prospective Studies Collaboration. Body-mass index and cause-specific mortality  
699 in 900,000 adults: collaborative analyses of 57 prospective studies. *The Lancet*.  
700 373(9669):1083-96.
- 701 3. Nordestgaard BG, Palmer TM, Benn M, Zacho J, Tybjaerg-Hansen A, Davey Smith  
702 G, et al. The Effect of Elevated Body Mass Index on Ischemic Heart Disease Risk: Causal  
703 Estimates from a Mendelian Randomisation Approach. *PLOS Medicine*.  
704 2012;9(5):e1001212.
- 705 4. Adams TD, Gress RE, Smith SC, Halverson RC, Simper SC, Rosamond WD, et al.  
706 Long-Term Mortality after Gastric Bypass Surgery. *New England Journal of Medicine*.  
707 2007;357(8):753-61.
- 708 5. Christou NV SJ, Liberman M, Look D, Auger S, McLean APH, MacLean LD. Surgery  
709 decreases long-term mortality, morbidity, and health care use in morbidly obese  
710 patients. *Ann Surg*. 2004;240:416-24.
- 711 6. Hägg S, Fall T, Ploner A, Mägi R, Fischer K, Draisma HH, et al. Adiposity as a cause  
712 of cardiovascular disease: a Mendelian randomization study. *International Journal of*  
713 *Epidemiology*. 2015;44:578-586.
- 714 7. Mozaffarian D, Benjamin EJ, Go AS, Arnett DK, Blaha MJ, Cushman M, et al. Heart  
715 Disease and Stroke Statistics—2015 Update. *Circulation*. 2015;131:e29-e322.
- 716 8. Halcox J PJ DJ. Childhood origins of endothelial dysfunction. *Heart*. 2005;91:1272-  
717 4.
- 718 9. Oren A, Vos LE, Uiterwaal CM, Grobbee DE, Bots ML. Cardiovascular risk factors  
719 and increased carotid intima-media thickness in healthy young adults: The  
720 atherosclerosis risk in young adults (arya) study. *Archives of Internal Medicine*.  
721 2003;163(15):1787-92.
- 722 10. Wildman RP, Mackey RH, Bostom A, Thompson T, Sutton-Tyrrell K. Measures of  
723 Obesity Are Associated With Vascular Stiffness in Young and Older Adults.  
724 *Hypertension*. 2003;42(4):468.

- 725 11. Lorber R, Gidding SS, Daviglius ML, Colangelo LA, Liu K, Gardin JM. Influence of  
726 systolic blood pressure and body mass index on left ventricular structure in healthy  
727 African-American and white young adults: the CARDIA study. *Journal of the American*  
728 *College of Cardiology*. 2003;41(6):955-60.
- 729 12. Haycock PC, Burgess S, Wade KH, Bowden J, Relton C, Davey Smith G. Best (but  
730 oft-forgotten) practices: the design, analysis, and interpretation of Mendelian  
731 randomization studies. *The American Journal of Clinical Nutrition*. 2016;103:965-978.
- 732 13. Davey Smith G HG. Mendelian randomization: genetic anchors for causal  
733 inference in epidemiology studies. *Hum Mol Genet*. 2014;23:R89-R98.
- 734 14. Ware JJ, Timpson N, Davey Smith G, Munafò MR. A recall-by-genotype study of  
735 CHRNA5-A3-B4 genotype, cotinine and smoking topography: study protocol. *BMC*  
736 *Medical Genetics*. 2014;15:13
- 737 15. Hellmich C, Durant C, Jones MW, Timpson NJ, Bartsch U, Corbin LJ. Genetics, sleep  
738 and memory: a recall-by-genotype study of ZNF804A variants and sleep  
739 neurophysiology. *BMC Medical Genetics*. 2015;16:96.
- 740 16. Boyd A GJ, Macleod J, Lawlor DA, Fraser A, Henderson J, Molloy L, Ness A, Ring S,  
741 Davey Smith G. Cohort Profile: the 'children of the 90s'--the index offspring of the Avon  
742 Longitudinal Study of Parents and Children. *International Journal of Epidemiology*.  
743 2013;42:111-27.
- 744 17. Fraser A, Macdonald-Wallis C, Tilling K, Boyd A, Golding J, Davey Smith G, et al.  
745 Cohort Profile: The Avon Longitudinal Study of Parents and Children: ALSPAC mothers  
746 cohort. *International Journal of Epidemiology*. 2013;42(1):97-110.
- 747 18. Paternoster L HL, Tilling K, Weedon MN, Freathy RM, Frayling TM, Kemp JP,  
748 Davey Smith G, Timpson NJ, Ring SM, Evans DM, Lawlor DA. Adult height variants affect  
749 birth length and growth rate in children. *Hum Mol Genet*. 2011;20:4069-75.
- 750 19. Sieradzka D PR, Freeman D, Cardno AG, McGuire P, Plomin R, Meaburn EL,  
751 Dudbridge F, Ronald A. Are genetic risk factors for psychosis also associated with  
752 dimension-specific psychotic experiences in adolescence? *PLoS ONE*. 2014;9:e94398.
- 753 20. Speliotes EK, Willer CJ, Berndt SI, Monda KL, Thorleifsson G, Jackson AU, et al.  
754 Association analyses of 249,796 individuals reveal 18 new loci associated with body  
755 mass index. *Nat Genet*. 2010;42(11):937-48.
- 756 21. Locke AE, Kahali B, Berndt SI, Justice AE, Pers TH, Day FR, et al. Genetic studies of  
757 body mass index yield new insights for obesity biology. *Nature*. 2015;518(7538):197-  
758 206.
- 759 22. O'Brien E, Asmar R, Beilin L, Imai Y, Mallion J-M, Mancia G, et al. European  
760 Society of Hypertension recommendations for conventional, ambulatory and home  
761 blood pressure measurement. *Journal of Hypertension*. 2003;21(5):821-48. P
- 762 23. Lang RM BM, Devereux RB, Flachskampf FA, Foster E, Pellikka PA, Picard MH,  
763 Roman MJ, Seward J, Shanewise JS, Solomon SD, Spencer KT, Sutton MS, Stewart WJ.  
764 Recommendations for chamber quantification: A report from the american society of  
765 echocardiography's guidelines and standards committee and the chamber  
766 quantification writing group, developed in conjunction with the european association of  
767 echocardiography, a branch of the european society of cardiology. *J Am Soc*  
768 *Echocardiogr*. 2005;18:1440-63.
- 769 24. Steeden JA, Atkinson D, Hansen MS, Taylor AM, Muthurangu V. Rapid Flow  
770 Assessment of Congenital Heart Disease with High-Spatiotemporal-Resolution Gated  
771 Spiral Phase-Contrast MR Imaging. *Radiology*. 2011;260(1):79-87.

- 772 25. Stergiopoulos N MJ, Westerhof N. Simple and accurate way for estimating total  
773 and segmental arterial compliance: the pulse pressure method. *Ann Biomed Eng.*  
774 1994;22:392-7.
- 775 26. OPCS. Standard Occupational Classification Volume 3. London: HMSO; 1991.
- 776 27. Anderson EL TK, Fraser A, Macdonald-Wallis C, Emmett P, Cribb V, Northstone K,  
777 Lawlor DA, Howe LD. Estimating trajectories of energy intake through childhood and  
778 adolescence using linear-spline multilevel models. *Epidemiology.* 2013;24:507-15.
- 779 28. Mattocks C NA, Leary S, Tilling K, Blair SN, Shield J, Deere K, Saunders J, Kirkby J,  
780 Smith GD, Wells J, Wareham N, Reilly J, Riddoch C. Use of accelerometers in a large field-  
781 based study of children: protocols, design issues, and effects on precision. *J Phys Act*  
782 *Health.* 2008;5:S98-S111.
- 783 29. Palmieri V, de Simone G, Arnett DK, Bella JN, Kitzman DW, Oberman A, et al.  
784 Relation of various degrees of body mass index in patients with systemic hypertension  
785 to left ventricular mass, cardiac output, and peripheral resistance (The Hypertension  
786 Genetic Epidemiology Network Study). *The American Journal of Cardiology.*  
787 2001;88(10):1163-8.
- 788 30. Chinali M, Devereux RB, Howard BV, Roman MJ, Bella JN, Liu JE, et al. Comparison  
789 of cardiac structure and function in American Indians with and without the metabolic  
790 syndrome (the Strong Heart Study). *The American Journal of Cardiology.*  
791 2004;93(1):40-4.
- 792 31. Palmer TM LD, Harbord RM, Sheehan NA, Tobias JH, Timpson NJ, Davey Smith G,  
793 Sterne JAC. Using multiple genetic variants as instrumental variables for modifiable risk  
794 factors. *Stat Methods Med Res.* 2012;21:223-42.
- 795 32. Richmond RC DSG, Ness AR, den Hoed M, McMahon G, Timpson NJ. Assessing  
796 causality in the association between child adiposity and physical activity levels: a  
797 Mendelian randomization analysis. *PLOS Med.* 2014;11:e1001618.
- 798 33. JH SDaS. Instrumental variables regression with weak instruments.  
799 *Econometrica.* 1997;65:557-86.
- 800 34. Baum C SM, Stillman S. IVENDOG: Stata module to calculate Durbin-Wu-Hausman  
801 endogeneity test after ivreg. In: S494401 SSC, editor. Boston: Boston Collge Department  
802 of Economics 2007.
- 803 35. Ferreira JP, Girerd N, Bozec E, Machu JL, Boivin JM, London GM, et al. Intima-  
804 Media Thickness Is Linearly and Continuously Associated With Systolic Blood Pressure  
805 in a Population-Based Cohort (STANISLAS Cohort Study). *Journal of the American Heart*  
806 *Association.* 2016;5(6).
- 807 36. Kim EJ, Park CG, Park JS, Suh SY, Choi CU, Kim JW, et al. Relationship between  
808 blood pressure parameters and pulse wave velocity in normotensive and hypertensive  
809 subjects: invasive study. *J Hum Hypertens.* 2006;21(2):141-8.
- 810 37. Malcolm DD, Burns TL, Mahoney LT, Lauer RM. Factors Affecting Left Ventricular  
811 Mass in Childhood: The Muscatine Study. *Pediatrics.* 1993;92(5):703-9.
- 812 38. Johnson W, Kuh D, Tikhonoff V, Charakida M, Woodside J, Whincup P, et al. Body  
813 Mass Index and Height From Infancy to Adulthood and Carotid Intima-Media Thickness  
814 at 60 to 64 Years in the 1946 British Birth Cohort Study. *Arteriosclerosis, Thrombosis,*  
815 *and Vascular Biology.* 2014;34(3):654-60.
- 816 39. de Simone G, Devereux RB, Daniels SR, Koren MJ, Meyer RA, Laragh JH. Effect of  
817 growth on variability of left ventricular mass: Assessment of allometric signals in adults  
818 and children and their capacity to predict cardiovascular risk. *Journal of the American*  
819 *College of Cardiology.* 1995;25(5):1056-62.

- 820 40. Stergiakouli E, Gaillard R, Tavaré JM, Balthasar N, Loos RJ, Taal HR, et al.  
821 Genome-wide association study of height-adjusted BMI in childhood identifies  
822 functional variant in ADCY3. *Obesity (Silver Spring, Md)*. 2014;22(10):2252-9.
- 823 41. Bowden J, Davey Smith G, Burgess S. Mendelian randomization with invalid  
824 instruments: effect estimation and bias detection through Egger regression.  
825 *International Journal of Epidemiology*. 2015. 512-525.
- 826 42. Corbin LJ, Richmond RC, Wade KH, Burgess S, Bowden J, Smith GD, et al. Body  
827 mass index as a modifiable risk factor for type 2 diabetes: Refining and understanding  
828 causal estimates using Mendelian randomisation. *Diabetes*. 2016;65:3002-7.
- 829 43. Bowden J, Davey Smith G, Haycock PC, Burgess S. Consistent Estimation in  
830 Mendelian Randomization with Some Invalid Instruments Using a Weighted Median  
831 Estimator. *Genetic Epidemiology*. 2016;40(4):304-14.
- 832 44. Hartwig FP, Davies NM. Why internal weights should be avoided (not only) in  
833 MR-Egger regression. *International Journal of Epidemiology*. 2016;45:1676-1678.
- 834 45. Bowden FJ, Burgess S, Davey Smith G. Response to Hartwig and Davies.  
835 *International Journal of Epidemiology*. 2016;45:1679-1680.
- 836 46. Yaghoobkar H, Lotta LA, Tyrrell J, Smit RAJ, Jones SE, Donnelly L, et al. Genetic  
837 Evidence for a Link Between Favorable Adiposity and Lower Risk of Type 2 Diabetes,  
838 Hypertension, and Heart Disease. *Diabetes*. 2016;65(8):2448-60.
- 839 47. Charakida M JA, Falaschetti E, Khan T, Finer N, Sattar N, Hingorani A, Lawlor DA,  
840 Davey Smith G, Deanfield JE. Childhood obesity and vascular phenotypes: a population  
841 study. *Journal of the American College of Cardiology*. 2012;60:2643-50.
- 842 48. Lavie CJ AC, Ventura HO, Messerli FH. Left atrial abnormalities indicating  
843 diastolic ventricular dysfunction in cardiopathy of obesity. *Chest*. 1967;92:1042-6.
- 844 49. Vaziri SM LM, Lauer MS, Benjamin EJ, Levy D. Influence of blood pressure on left  
845 atrial size. The Framingham Heart Study. *Hypertension*. 1995;25:1155-60.
- 846 50. Burgess S, Timpson NJ, Ebrahim S, Davey Smith G. Mendelian randomization:  
847 where are we now and where are we going? *International Journal of Epidemiology*.  
848 2015;44(2):379-88.
- 849 51. Gray L, Lee IM, Sesso HD, Batty GD. Blood pressure in early adulthood,  
850 hypertension in middle-age, and future cardiovascular disease mortality: the Harvard  
851 Alumni Health Study. *Journal of the American College of Cardiology*. 2011;58(23):2396-  
852 403.
- 853 52. Levy D, Garrison RJ, Savage DD, Kannel WB, Castelli WP. Prognostic Implications  
854 of Echocardiographically Determined Left Ventricular Mass in the Framingham Heart  
855 Study. *New England Journal of Medicine*. 1990;322(22):1561-6.
- 856 53. Dhuper S AR, Weichbrod L, Mahdi E, Cohen HW. Association of obesity and  
857 hypertension with left ventricular geometry and function in children and adolescents.  
858 *Obesity*. 2011;19:128-33.
- 859 54. Friedemann C, Heneghan C, Mahtani K, Thompson M, Perera R, Ward AM.  
860 Cardiovascular disease risk in healthy children and its association with body mass  
861 index: systematic review and meta-analysis. *BMJ : British Medical Journal*.  
862 2012;345:e4759.
- 863 55. Bogers RP, Bemelmans WE, Hoogenveen RT, et al. Association of overweight with  
864 increased risk of coronary heart disease partly independent of blood pressure and  
865 cholesterol levels: A meta-analysis of 21 cohort studies including more than 300 000  
866 persons. *Archives of Internal Medicine*. 2007;167(16):1720-8.
- 867 56. Meyer AA, Kundt G, Steiner M, Schuff-Werner P, Kienast W. Impaired Flow-  
868 Mediated Vasodilation, Carotid Artery Intima-Media Thickening, and Elevated



- 869 Endothelial Plasma Markers in Obese Children: The Impact of Cardiovascular Risk  
870 Factors. *Pediatrics*. 2006;117(5):1560-7.
- 871 57. Woo KS, Chook P, Yu CW, Sung RYT, Qiao M, Leung SSF, et al. Overweight in  
872 children is associated with arterial endothelial dysfunction and intima-media  
873 thickening. *Int J Obes Relat Metab Disord*. 2004;28(7):852-7.
- 874 58. Iannuzzi A, Licenziati MR, Acampora C, Salvatore V, Auriemma L, Romano ML, et  
875 al. Increased Carotid Intima-Media Thickness and Stiffness in Obese Children. *Diabetes*  
876 *Care*. 2004;27(10):2506.
- 877 59. Urbina EM, Kimball TR, Khoury PR, Daniels SR, Dolan LM. Increased Arterial  
878 Stiffness is Found in Adolescents with Obesity or Obesity-Related Type 2 Diabetes  
879 Mellitus. *Journal of hypertension*. 2010;28(8):1692-8.
- 880 60. Corden B, Keenan NG, de Marvao ASM, Dawes TJW, DeCesare A, Diamond T, et al.  
881 Body Fat Is Associated With Reduced Aortic Stiffness Until Middle Age. *Hypertension*.  
882 2013;61(6):1322-7.
- 883 61. Sorof JM, Poffenbarger T, Franco K, Bernard L, Portman RJ. Isolated systolic  
884 hypertension, obesity, and hyperkinetic hemodynamic states in children. *The Journal of*  
885 *Pediatrics*. 2002;140(6):660-6.
- 886 62. Jiang X, Srinivasan SR, Urbina E, Berenson GS. Hyperdynamic Circulation and  
887 Cardiovascular Risk in Children and Adolescents. *Circulation*. 1995;91(4):1101-6.
- 888 63. Smith GD, Lawlor DA, Harbord R, Timpson N, Day I, Ebrahim S. Clustered  
889 Environments and Randomized Genes: A Fundamental Distinction between  
890 Conventional and Genetic Epidemiology. *PLOS Medicine*. 2007;4(12):e352.
- 891 64. Cole SR, Platt RW, Schisterman EF, Chu H, Westreich D, Richardson D, et al.  
892 Illustrating bias due to conditioning on a collider. *International Journal of Epidemiology*.  
893 2010;39(2):417-20.
- 894 65. Aschard H, Vilhjálmsson Bjarni J, Joshi Amit D, Price Alkes L, Kraft P. Adjusting  
895 for Heritable Covariates Can Bias Effect Estimates in Genome-Wide Association Studies.  
896 *American Journal of Human Genetics*. 2015;96(2):329-39.
